# Supplementary material for: Long-term assessment of six-stacked scaled-up MFCs treating swine manure with different electrode materials
Source: Royal Society of Chemistry journal article supplement (doi:10.1039/c7ew00079k), 2017-01-01
Supplement: c7ew00079k1.pdf [file c7ew00079k1.pdf]

## Supporting information for manuscript

### Long-term assessment of the six-stacked scaled-up MFCs treating swine manure with different electrode materials

Vilajeliu-Pons, A.<sup>a</sup>, Puig, S.<sup>a\*</sup>, Salcedo-Dávila, I.<sup>b</sup>, Balaguer, M.D.<sup>a</sup> and Colprim, J.<sup>a</sup>

<sup>a</sup> LEQUiA, Institute of the Environment, University of Girona, Girona, Spain.

<sup>b</sup> Abengoa Water SLU, Dos Hermanas, Sevilla, Spain

\*Corresponding author:

E-mail address: [sebastia@lequia.udg.cat](mailto:sebastia@lequia.udg.cat) (S. Puig)

Laboratory of Chemical and Environmental Engineering (LEQUiA), Institute of the Environment, University of Girona, C/Maria Aurèlia Capmany, 69, Facultat de Ciències, E-17071 Girona, Spain.

Tel: +34972418182; Fax: +34972418150

## Summary

**Fig. S1** Pictures of granular graphite electrode material in the first anode compartment of the stacked scaled-up MFC. The pictures were taken at A) the beginning of the experimental period and B) at the end of the experimental period (6 months). Moreover, an enlarged image at the end of the experimental period (B) showed a solid accumulation of 1.5 cm thick (C).

**Fig. S2** Evolution of the anodic volumes and the hydraulic retention time (HRT) in the stacked scaled-up MFC with both electrode materials granular graphite and stainless steel mesh, at the beginning of the experimental period (1<sup>st</sup> month) and at the end of it (6<sup>th</sup> month).

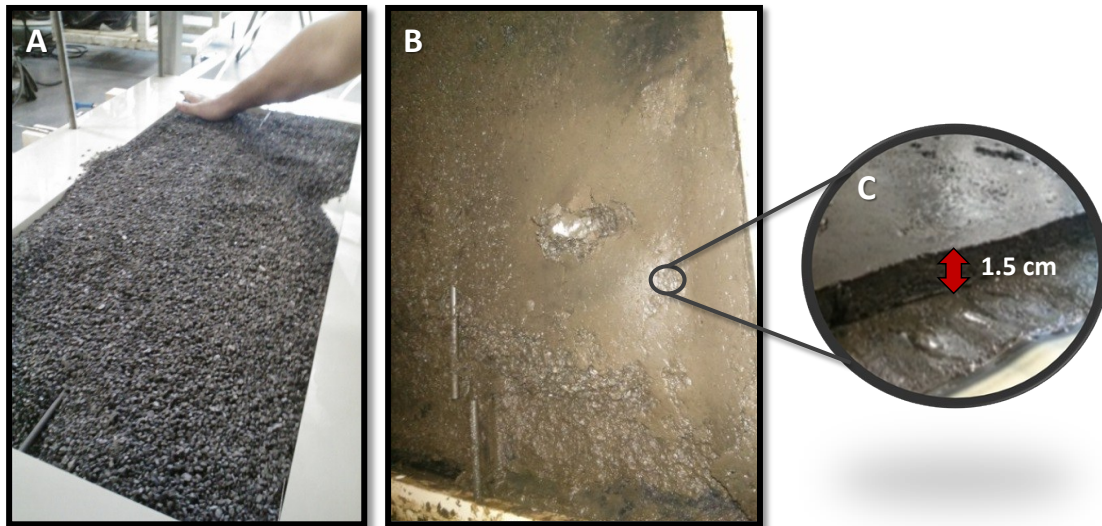

Anode compartment

**Fig. S1** Pictures of granular graphite electrode material in the first anode compartment of the stacked scaled-up MFC. The pictures were taken at A) the beginning of the experimental period and B) at the end of the experimental period (6 months). Moreover, an enlarged image at the end of the experimental period (B) showed a solid accumulation of 1.5 cm think (C).

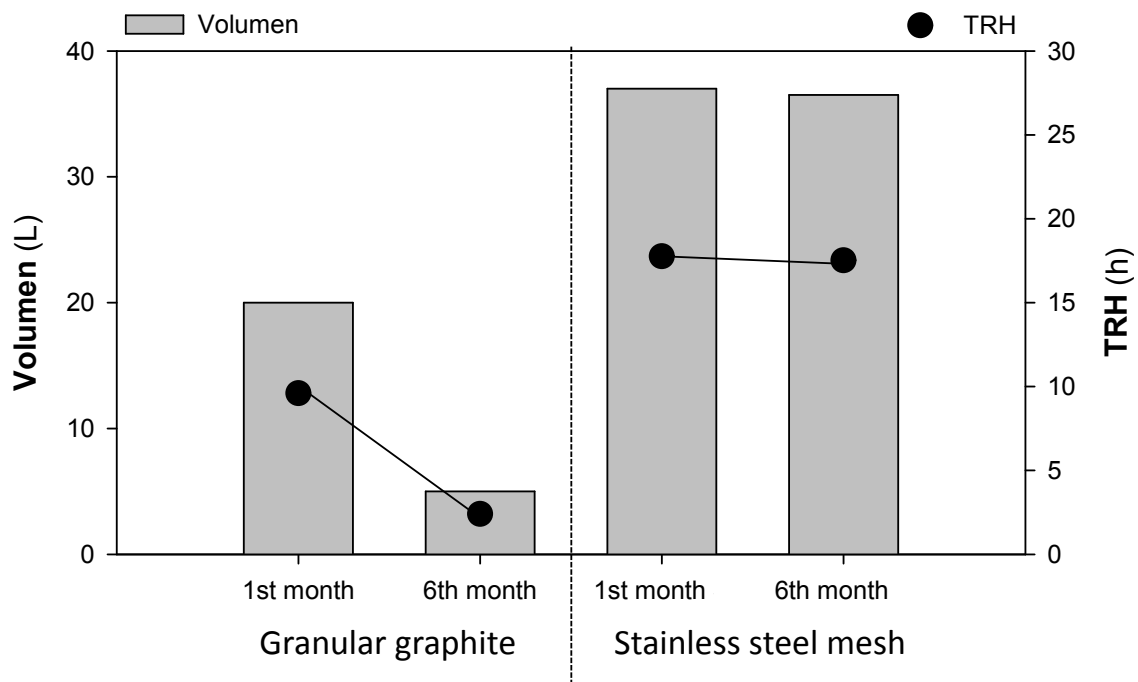

**Fig. S2** Evolution of the anodic volumes and the hydraulic retention time (HRT) in the stacked scaled-up MFC with both electrode materials granular graphite and stainless steel mesh, at the beginning of the experimental period (1<sup>st</sup> month) and at the end of it (6<sup>th</sup> month).
